# Supplementary material for: [Ni(tmen)(acac)][B(Ph)4] a probe for the anion basicity of ionic liquids
Source: Royal Society of Chemistry journal article supplement (doi:10.1039/b920530f), 2010-01-01
Supplement: b920530f-13.pdf [file b920530f-13.pdf]

## CYPHOS® IL 167

**Chemical Name:** tributyl(tetradecyl)phosphonium chloride

**Chemical Abstracts Number:** [81741-28-8]

**Molecular Formula:** C<sub>26</sub>H<sub>56</sub>ClP

**Formula Weight:** 435.15

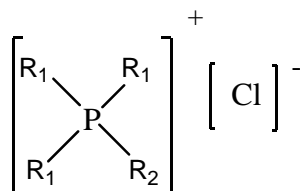

R<sub>1</sub> = butyl; R<sub>2</sub> = tetradecyl

### Properties:

|                                  |       |
|----------------------------------|-------|
| Assay (% by <sup>31</sup> P NMR) | 97.1  |
| Water (% by K.F.)                | 0.62  |
| Total halide content (ppm)       | -     |
| Physical State (R.T.)            | Solid |
| Melting Point (°C)               | 45    |
| Glass Transition Temp. (°C)      |       |
| Density (25 °C - g/cc)           |       |
| Viscosity (40 °C – mPa.s or cP ) |       |

### Co-Solvent Miscibility:

| <u>Solvent</u>         | <u>Miscible(Y/N)<sup>(1)</sup></u> |
|------------------------|------------------------------------|
| Water                  | N                                  |
| 2-hydroxypropane (IPA) | Y                                  |
| Tetrahydrofuran        | Y                                  |
| Dichloromethane        | Y                                  |
| Diethylether           | Y                                  |
| Toluene                | Y                                  |
| Hexane                 | N                                  |

(1) Visual observation of a 1:1 mixture

(2) Supercooled

Date: 7/14/08

## CYPHOS IL 167 Scholarly References

---

• Email: [custinfo@cytec.com](mailto:custinfo@cytec.com) Worldwide Contact Info: [www.cytec.com](http://www.cytec.com) US Toll Free: 800-652-6013 Tel: (+1) 973-357-3193 •

Cytec Industries Inc. in its own name and on behalf of its affiliated companies (collectively, "Cytec") decline any liability with respect to the use made by anyone of the information contained herein. The information contained herein represents Cytec's best knowledge thereon without constituting any express or implied guarantee or warranty of any kind (including, but not limited to, regarding the accuracy, the completeness or relevance of the data set out herein). Cytec is the sole owner or authorized user of the intellectual property rights relating to the information communicated. The information relating to the use of the products is given for information purposes only. No guarantee or warranty is provided that the product is adapted for any specific use. The user or purchaser should perform its own tests to determine the suitability for a particular purpose. The final choice of use of a product remains the sole responsibility of the user.

© 2008 Cytec Industries Inc. All Rights Reserved

TRADEMARK NOTICE: The ® indicates a Registered Trademark in the United States and the ™ or \* indicates a Trademark in the United States. The mark may also be registered, the subject of an application for registration or a trademark in other countries
